# Supplementary material for: Relationship of Thyroid Function with Renal Hemodynamics and Cholesterol Metabolism in Proteinuric Kidney Disease: A Pilot Study
Source: MDPI journal article supplement (doi:10.3390/metabo14020111), 2024-02-07
Supplement: s1 [file s1]

**Relationship of thyroid function with renal hemodynamics and cholesterol metabolism in proteinuric kidney disease: A pilot study**

Yoshitaka Iwazu,<sup>1,2,3</sup> Kazuhiko Kotani,<sup>1,4</sup> Taro Sugase,<sup>5</sup> Daisuke Nagata,<sup>3</sup>

Toshiyuki Yamada<sup>1</sup>

<sup>1</sup> Department of Clinical Laboratory Medicine, Jichi Medical University, Shimotsuke, Tochigi 329-0498, Japan

<sup>2</sup> Division of Anti-ageing Medicine, Center for Molecular Medicine, Jichi Medical University, Shimotsuke, Tochigi 329-0498, Japan

<sup>3</sup> Department of Nephrology, Jichi Medical University, Shimotsuke, Tochigi 329-0498, Japan

<sup>4</sup> Division of Community and Family Medicine, Center for Community Medicine, Jichi Medical University, Shimotsuke, Tochigi 329-0498, Japan

<sup>5</sup> Seikai Medical Clinic Nasu, Otawara, Tochigi, 324-0063, Japan

**Corresponding author**

Yoshitaka Iwazu, MD, PhD

Department of Clinical Laboratory Medicine, Jichi Medical University, 3311-1 Yakushiji, Shimotsuke 329-0498, Tochigi, JAPAN

TEL: +81-285-58-7346, FAX: +81-285-44-4869

E-mail: iwazu@jichi.ac.jp

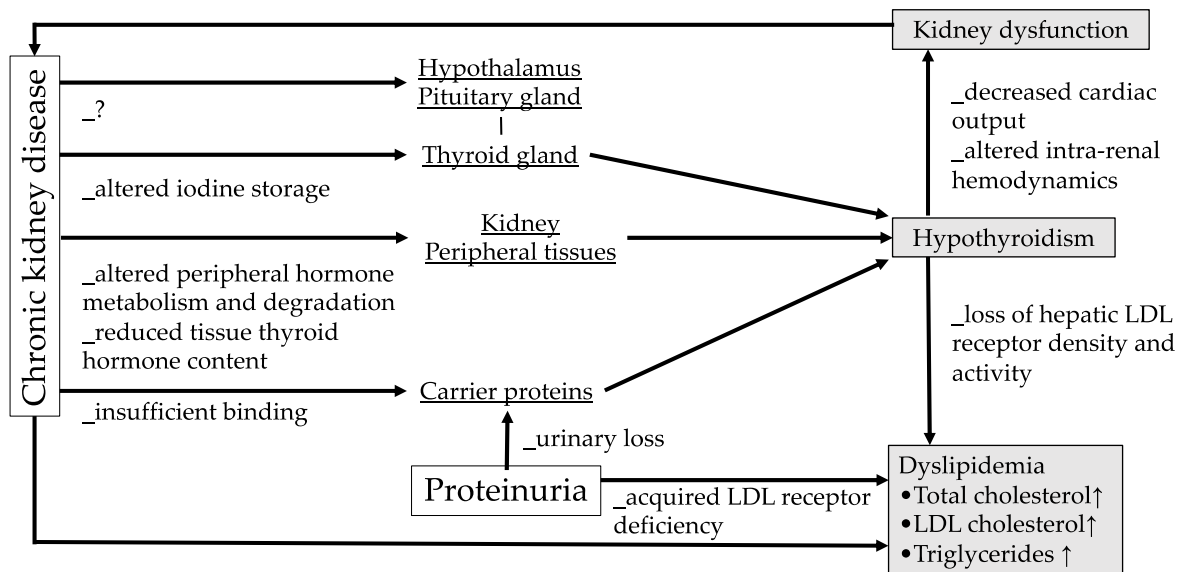

**Figure S1.** Factors contributing to hypothyroidism in chronic kidney disease, and interrelationship between proteinuric kidney disease, hypothyroidism, and lipids (thyroid kidney cholesterol axis). LDL: low-density lipoprotein.

**Table S1.** Correlations of filtration fraction and total cholesterol levels with free triiodothyronine (FT3) and thyroxine (FT4).

| Variable (units) | Filtration fraction | Total cholesterol |
|------------------|---------------------|-------------------|
|                  | $\beta$ (P value)   | $\beta$ (P value) |
| FT3 (pg/mL)      | 0.51 (0.02)         | -0.06 (0.76)      |
| FT4 (ng/dL)      | 0.14 (0.48)         | -0.45 (0.02)      |
